# Supplementary material
Source: PubMed Central journal article supplement (PMC2877494)

**Supplemental Fig. 1.** IFN $\beta$  inhibits CCR7 expression in DC matured with Poly:IC+PGE2 or TNF- $\alpha$ +IFN $\alpha$ +PGE2.

DC were treated with (A) TNF- $\alpha$  (20ng/ml)+IFN $\alpha$  (1,000 IU/ml)+PGE2 ( $10^{-6}$ M) or (B) Poly I:C (25 $\mu$ g/ml)+PGE2 in the presence or absence of IFN $\beta$  (1,000 IU/ml). 24h later RNA was extracted and subjected to real-time RT-PCR for CCR7. Data are representative of two independent experiments.

**Supplemental Fig. 2.** Cytokine cocktail-induced maturation of DC generated from STAT-1 deficient mice

DC generated from STAT-1 deficient mice were treated for 24h with TNF- $\alpha$ , IL-1 $\beta$ , IL-6, and PGE2 in the presence or absence of IFN $\beta$  or with LPS (1 $\mu$ g/ml). The expression of CD40, CD80, and CD86 was analyzed by FACS. Data are representative of two independent experiments.

**Supplemental Fig. 3.** IFN $\beta$  inhibits migration of DC matured with TNF- $\alpha$ +IFN $\alpha$ +PGE2 and Poly I:C+PGE2.

DC were matured with (A) TNF- $\alpha$ +IFN $\alpha$ +PGE2 or (B) Poly I:C+PGE2 in the presence or absence of IFN $\beta$  for 24h. Chemotaxis towards CCL19 was performed.

Data are representative of three independent experiments for A and two independent experiments for B.

**Supplemental Fig. 4.** IFN $\beta$  inhibits MMP-9 production in DC matured with TNF- $\alpha$ +IFN $\alpha$ +PGE $_2$ - and Poly I:C+PGE $_2$ .

DC were treated with TNF- $\alpha$ +IFN $\alpha$ +PGE $_2$  (**A**) or with Poly I:C+PGE $_2$  (**B**) with or without IFN $\beta$ . RNA was extracted 24h later and subjected to MMP-9 real-time RT-PCR.

# Supplemental Fig. 1

(A)

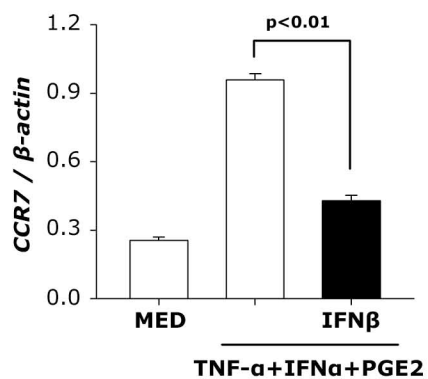

(B)

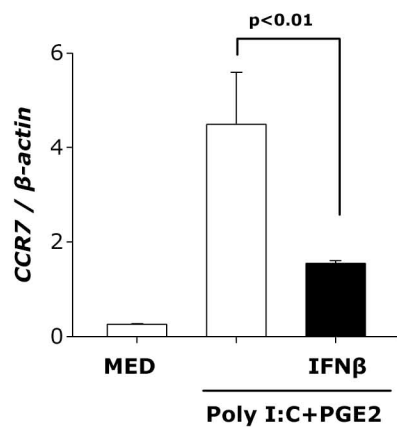

Supplemental Fig. 2

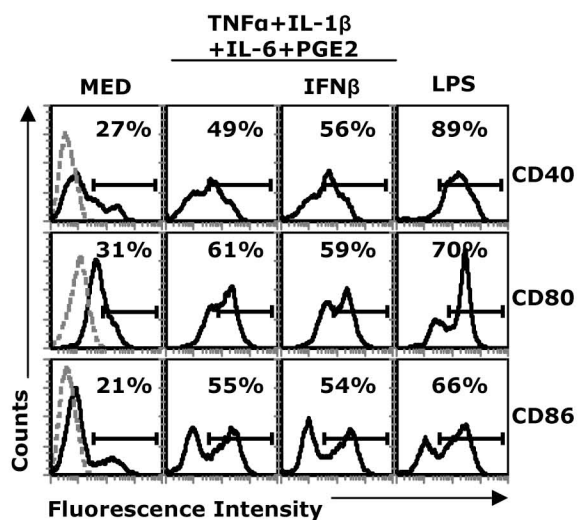

Supplemental Fig. 3

(A)

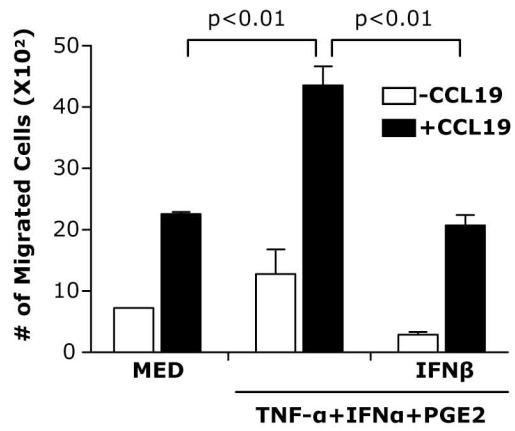

(B)

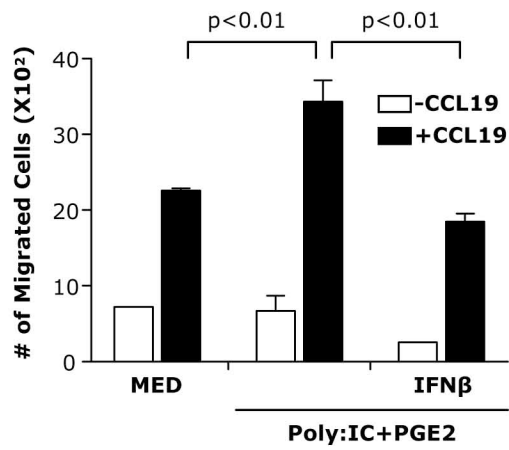

# Supplemental Fig. 4

(A)

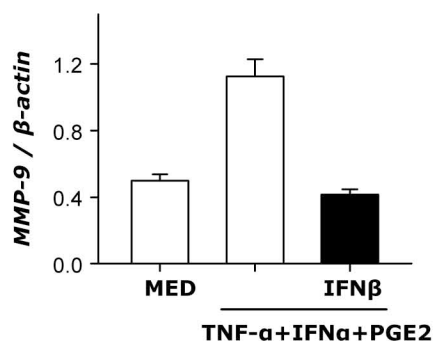

(B)

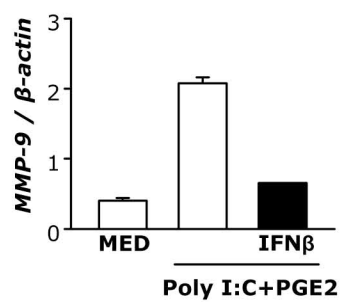

Supplement: NIHMS181572-supplement-01.pdf [file NIHMS181572-supplement-01.pdf]
